# Supplementary material
Source: PubMed Central journal article supplement (PMC6816085)
Supplement: supp_RA119.008580_144490_1_supp_380119_pwhnfw.pdf [file supp_RA119.008580_144490_1_supp_380119_pwhnfw.pdf]

## Supporting Information

### The vault RNA of *Trypanosoma brucei* plays a role in the production of *trans*-spliced mRNA

Nikolay G. Kolev<sup>1\*</sup>, K. Shanmugha Rajan<sup>2</sup>, Kazimierz T. Tycowski<sup>3</sup>, Justin Y. Toh<sup>1</sup>, Huafang Shi<sup>1</sup>, Yuling Lei<sup>1</sup>, Shulamit Michaeli<sup>2</sup>, and Christian Tschudi<sup>1</sup>

From the <sup>1</sup>Department of Epidemiology of Microbial Diseases, Yale School of Public Health, 295 Congress Avenue, New Haven, CT 06536, USA; <sup>2</sup>The Mina and Everard Goodman Faculty of Life Sciences and Advanced Materials and Nanotechnology Institute, Bar-Ilan University, Ramat-Gan 52900, Israel; <sup>3</sup>Department of Molecular Biophysics and Biochemistry, Howard Hughes Medical Institute, Yale University School of Medicine, 295 Congress Avenue, New Haven, CT 06536, USA

Running title: *Trypanosome vtRNA affects mRNA metabolism*

\*To whom correspondence should be addressed: Nikolay G. Kolev: Department of Epidemiology of Microbial Diseases, Yale School of Public Health, 295 Congress Avenue, New Haven, CT 06536, USA; [nikolay.kolev@yale.edu](mailto:nikolay.kolev@yale.edu); Tel.(203) 785-3556; Fax. (203) 785-7329.

Includes:

Figure S1  
Figure S2  
Figure S3  
Figure S4  
Figure S5  
Figure S6  
Figure S7  
Figure S8

|          |                                                                                  |     |
|----------|----------------------------------------------------------------------------------|-----|
| Model_01 | MTSFTGTTFHAQETQVNGGGSTFMVSPMSASSTENMVLEKDELISLVCAALMSEVVF SAPDPENAASLDRSRDAA     | 75  |
| lyvp.2.D | -----S DMNRLRRFLCF GSE-GGTY YIEEK-----KLGQE                                      | 56  |
| Model_01 | RIATLVHSISAE-DGEFVLKLYVRRDLSIRLTAA-FLVALCAYE--RRCOPFLACYMKRIILLPSDWLNIANI        | 146 |
| lyvp.2.D | NAEALLRLIE DGKGC EVVQEIKTFSQEGRAAKQ EPTL FALAVCSQCSD IKTQAAFRAVPEVCRIP THLFTFIQF | 131 |
| Model_01 | AYSKPHLYLLARDGGESVTATTGTAECCECAQAIKGVFNALRDALAVTFTMFDEFSLA----KYNTERATKRSGRN     | 217 |
| lyvp.2.D | KKDL-K-----EGMKCGMWGRALRKA VSDWYN TKD ALNLA MAVTKYKDFN-----                      | 175 |
| Model_01 | QTTCDEYVRSRSEDGHTEARQVTIPSRITFKHLIRHLHLSHPVYAIN----CLL-G-K-----R                 | 270 |
| lyvp.2.D | -----GWSHKDLLRLSHIKPANEG LTMVAKYVSKG WKEVQEA YKEKELSPETEK                        | 224 |
| Model_01 | YPNTVDEFVORGLDEGGIRAFNSALCGORMRLPTPETWERTSREGNTAAVWDDL VARKCLPFMAAMRNLRNIVL      | 345 |
| lyvp.2.D | VLKYLEATERVVKR-----TKDELEI IHLID-EYRLVREHLLTIHLKSKETWKSLLQ--DMP L TALLRN LGKMTA  | 290 |
| Model_01 | CGCN---PTTHDSLLQLFSSEEHVFN SRQFPHRFMSAYEALDFDPEDALDKFSGKAMISVKPPGSP LPKI IKKR V  | 417 |
| lyvp.2.D | DSVLAPASSEVSSVCERTNEKLLKRAIHPFHILVALETYKKGEH-----NRGK                            | 340 |
| Model_01 | GKRIGKLP SLEEVKVKOMYRGAMQQA AEISARLNIIPISGRSLVILN MTRY-DL PAR---IQDLKNGVOLAVSF   | 488 |
| lyvp.2.D | ---L--EWIP-----DTSIVEALDN A FYKSF-KLVEPTGKRFLLAIDV SASMNOEVLG SILNASVVAAMCMLV    | 403 |
| Model_01 | YYACEDCSIILLCRGEFRIVDSEIRRENGILSCVENVDICR TLLQORDLEVMAELSRDLED SHRSRIFNFPYLY     | 563 |
| lyvp.2.D | ARTEKDSHM-VAE SDE--MLPCPI TVNMLLHEVVEKMSDIT-----M---G-S TDCALP                   | 450 |
| Model_01 | LDELIEKRVNLOALIVM-DC-VHSCYSGENHTPSLGDLPVYLERLRRTC NENL LFVALK VSGKNADRR TGLRYQ   | 636 |
| lyvp.2.D | MLWAQR T NTAADIFIVEEDCETNV---EDV-----HPATALKQYREKMGIPAKLIVCAMTSNGEFS-----IADPD   | 512 |
| Model_01 | HKNDFLLTGFSAAALRVVAEGVSCGPRRYVERIDQVYDVNVTTVRAGRCKFESDLRVLREVQGIEKERSNKSTEG      | 711 |
| lyvp.2.D | DRGMLDTCGFDSGALDVIRNFTLDL-----                                                   | 537 |

**Figure S1.** The von Willebrand factor A (vWFA) domain in *T. brucei* TEP1 lacks obvious metal ion-dependent adhesion site (MIDAS) motif. A SWISS-MODEL (Waterhouse *et al.*, 2018) sequence/structure alignment of the modeled *T. brucei* TROVE and vWFA domains with the *X. laevis* Ro60 TROVE/vWFA domains. The highly conserved MIDAS motif in the *X. laevis* vWFA domain (D-x-S-x-S...T...D) is highlighted with red amino acids. Except the last aspartate in the motif, the identities of the amino acids in the corresponding positions in the *T. brucei* TEP1 vWFA are different.

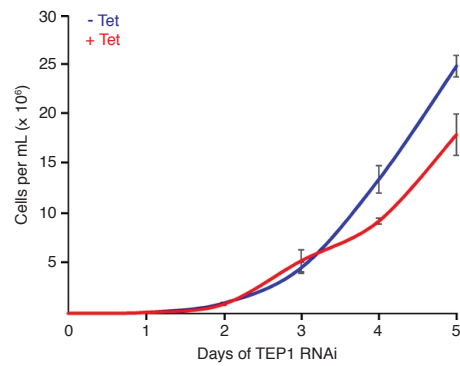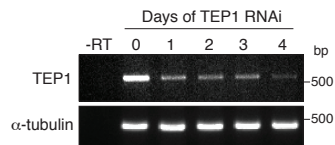

**Figure S2. Effect of targeting TEP1 by RNAi on growth of procyclic cells.** Uninduced cells carrying the TEP1 silencing construct (-Tet) were compared with cells induced for silencing (+Tet). Error bars, SEM; n=3. Semiquantitative RT-PCR assay is shown below for TEP1 and  $\alpha$ -tubulin mRNAs. Reactions without reverse transcriptase (without RNAi induction) are shown in the first lanes (-RT).

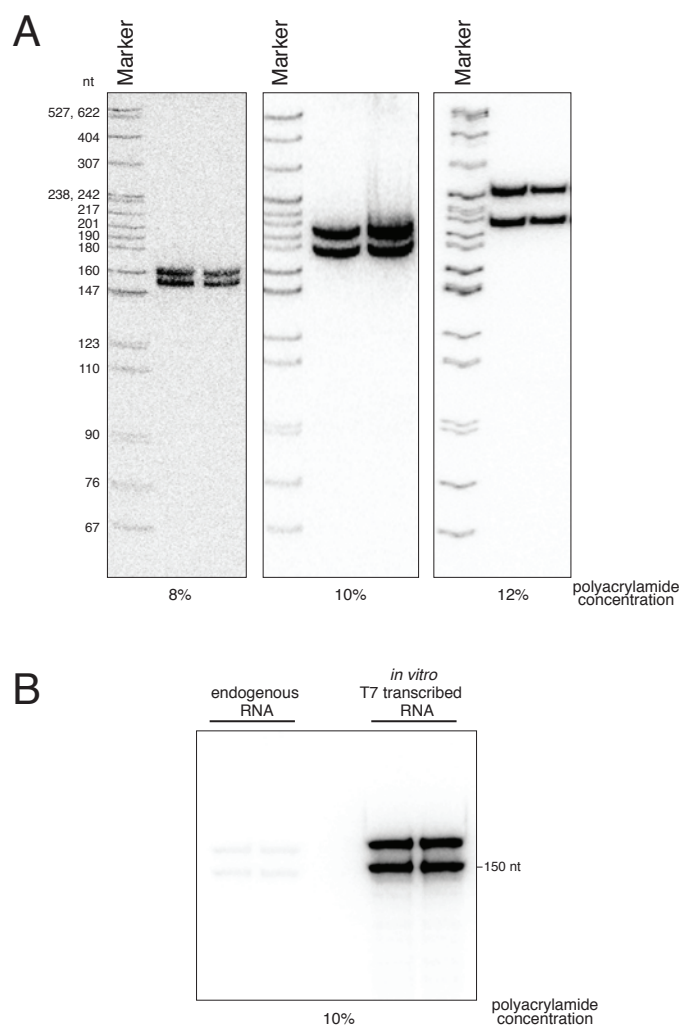

**Figure S3. Aberrant migration of *T. brucei* vtRNA in denaturing polyacrylamide gels.**

*A*, Northern blots of vtRNA in *T. brucei* total RNA samples subjected to electrophoresis in polyacrylamide gels of the indicated percentages in the presence of 8M urea. Marker is a  $^{32}\text{P}$ -labeled pBR322 DNA MspI digest. Portion of the middle panel is also shown in Fig. 1A. Note the difference in mobility in different percentage gels relative to the marker bands; *B*, comparison between the electrophoretic mobility of endogenous vtRNA (left) and vtRNA synthesized *in vitro* by T7 RNA polymerase run-off transcription (right).

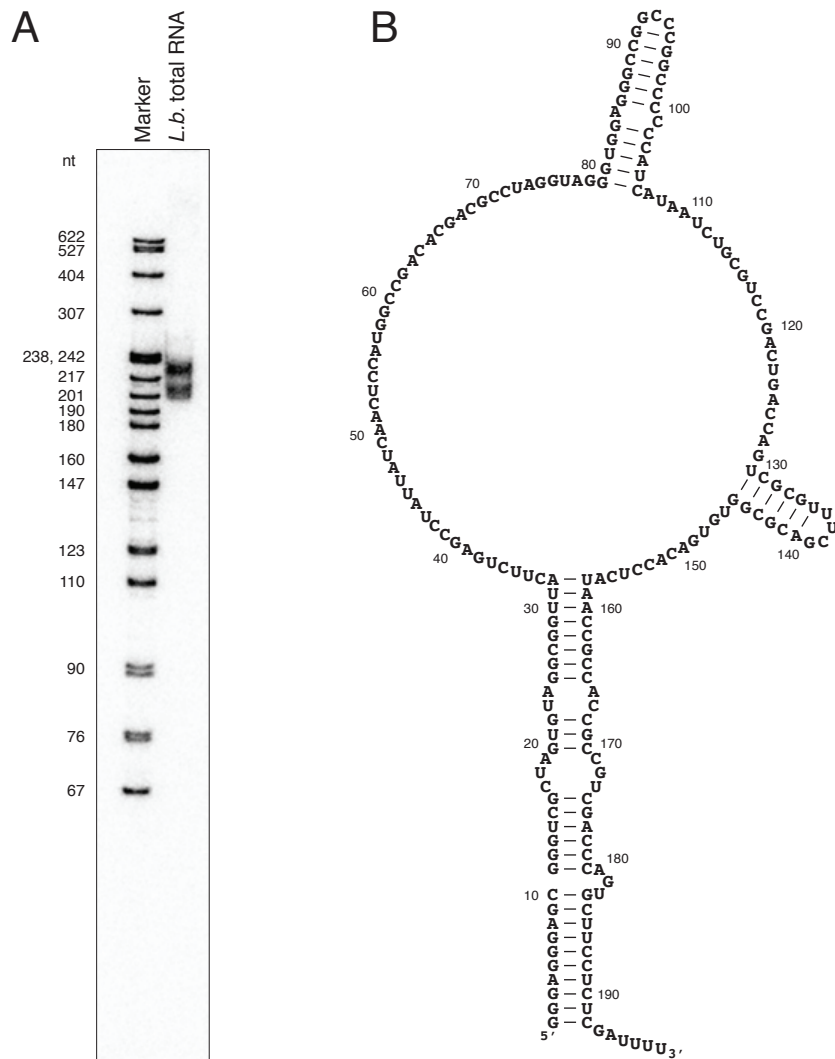

**Figure S4. vtRNA of *Leishmania braziliensis*.** *A*, Northern blot of total RNA from *L. braziliensis* with  $^{32}\text{P}$ -labeled antisense oligodeoxyribonucleotide against the bioinformatically predicted *L. braziliensis* vtRNA. Marker is a  $^{32}\text{P}$ -labeled pBR322 DNA MspI digest; *B*, predicted secondary structure model of vtRNA. Shown as double-stranded are only the terminal bulged helix and very stable hairpins emanating from the large internal loop.

***T. brucei* U2 snRNA gene**

CCAGCTGGTGAAACAACCATTCCTCAATCGGGGCGCGCTCCCTGCCATAGAGTGCTCAGTTCAATTTACCCGAGTG  
ACCGTCGCGGTAACCGCCGACAGTGCATCCACACGATAGAGGCACCAGGCTCCAACAGCCTGTTCAAATTACCA  
CCACAACCTGTAGTGGCGGTATCTTTCCAGGAAAGATTGGCCGCGTCTTGAGGCGCCGGGAGAAAAACATATGTA  
CGG**AGGTTCGAACC**TGCGGCCCAAGACGTAAGCACGGAAGTGCAATTTACG**ACACTGGTCCA**TTGCATCGACGG  
AGCCACCCGAATATATAATTACTTATTGAATTTATTCTTCGGTATTCTAGCTTGTTCAGCCTACGGAACCTTT  
GGATAAGGCGCTGCATATCTTCTCGGCTATTTAGCTAAGATCAAGTTATTAAGTGTCTTATCAGAGTAACCTCTG  
ATACGGGCTTTGGCCCAAGGATCAAACTGTTGGCTGTCCCGCTTCTCCGGGTTCCACTTGTCCGGATGGAGC  
GCGACGGTCGCAACGTTTTCCGACAAAACCAACCCTGAACGTTGTAAGGCAGTTATTGGAACGACCCGATTTC  
CATCACTTTATTCTCGCTTGGTGTATAC

***T. brucei* vtRNA gene**

CCTGGAACCGCGCATCCGAGGCCCCGCTACGATCGCGTGTTTTCAACGAGCGGAAGCGTGCCTCTCGAGATGAACGA  
AGAAATGAGGAACACTATCTCCAACAGTAGTGTCTATTGTGTTCCCGAGATTACCAAACCTCACGAAACCAATCAG  
ATTCGGACAAACGGCGCACCTCCGCAATCCCGCGGGCTTCTTTCCACAACAAAGCAGGTGCCGGAAGGTGA  
ATAAAAAAGAGGGAAAAGTG**GTAATCGAACC**TTGAGCATCAATGGTAAAG**CCACTCCACCA**TAACAACGGGACCGCG  
ACGTAATAAATAATCTAGCAATTAACCTTTAATCAGCTAGAACCCTTTGAATAGGAACCCGTGGAAGCCATAC  
GCCCGGGCGGGCGCAAGGATTTTCGATACCTTCTGCATAGCAACAGCAAAGGGCGTAGCTGTCCCGAGGGAGGG  
CACCAGCGCTTCCCCCACCCCGTGGCCCTCGGCCGCACTGGACGCAAGTCCACCCCTGTCCGAAGCCGCAATCG  
CCCTTTTCGCACGACGACTCGCATCAACATTGCGTTTCAGTGTGATTTATCTTTCCCTTCATTCCTCAGCACACC  
GCTTGAAGGGGATACCGCAGCTGGATT

***L. braziliensis* tRNA<sup>Ala</sup> and U2 snRNA genes**

AAACTCCTTCTTTCCCGGACAAGCACCGCCCCCTCCCTTACAATGACGAGCCGGCCCTCTGGCCAGACCAAAAA  
AAAATGGAGAAGTT**GGTATCGATCC**CAATACCTACCGCATGCTAAGCGGTGCTCTA**CCATCTGAGCTA**CATCCCC  
ACAACCTGCTTCTCTAAAAGGTTCGATACGTTCAAATAATGTGTTGGTGTAG**TGGATCGAACC**CGCGACCTAGTCGG  
CAGTGCATGCGGGCGCG**CCGTTGAAC**TCAAAACAGCTCGGCAGGAACGTCAGTAAACGCGGCGACCCCAAG  
ACAAAACGGTGTAAGCCATGTGGTAGCCTCTCTGCTTTTGTGAACGCTCGTGTAGC**ATATCTTCTCGGCTATTTAG**  
CTAAGATCATGTTTATAAAGTCTTATCAGAGTAACTCCTGATACGCTTCCGGCAAAGGAATAGAAATTATAA  
GTCGAGGTTGTTTCCCTGGAGCTCCACCTTCCAGGGGAGCAACTCTTTTTCCTCCGGGCAAGCATCTTCAGC  
AGAAGCTTGGCAAGCGTGCATTGCCCGGGCGGATGGTGAACGAAGGCTGCTCCTGGGG

***L. braziliensis* vtRNA gene**

ACGACGAAAGAGATGTGCTATTTTTTCGGCTCGGCTGGGTCTTTGTAAAATTGACAGGAGCG**GGGTTCGAACC**CGCG  
CCTACGAATAGAAGAACTTGAGTCTCCCGCCTTAGA**CCACTCGGCCA**TCTGCCTTGTGGTGTACGCTCTTTGC  
TTCTACCCACTGACGAAGTTAGCCGGAATAATCGTCACCAGCA**GGATTTCGAACC**TGCCGCGAGATCGCAGTTGAT  
TTCGAGTCAACCCCGTAA**CCACTTGGGTA**TGGTGACCACGTTACGACGGGATATGAATTGCCGTGTGGGTGAGGA  
GGAAAAGGGCGATTGACGTTGAGCTTGTGGTCTTGGCTTGTGACAGTGGGACGATAGGTGGTACCGTCTCGCG  
GTATCACCTTTTTATTGGAGGGAGCGGGTTCGCTAGTGTAGCGGTTACTTCTGAGCTATTATCAACTCCATGGC  
CGACACGACGCTAGGTAGGTGGAGGGCCCGCCCGCCCATCATAATCTGCGTCCGACTGACCAGTCCGCTTT  
CGACGCGGTGTGACACCTCATAACCGCCACCGCCGTCGACCCAGTGTCTCTCGATTTTCTTGCCGGGTGTCG  
AGCGGAAAGCTCTCAGAGTAGTCGTGCTGTAGAGCGTGCAGGGGGGGGGTGA

**Figure S5. The organization of the vtRNA and U2 snRNA genes in *T. brucei* and *L. braziliensis*.** The transcribed regions of the U2 snRNA, vtRNA and a tRNA<sup>Ala</sup> genes are highlighted in grey. Black arrow indicates the start and direction of transcription for the tRNA and U2 snRNA genes and the direction and putative transcription start site for the vtRNA genes. Highlighted in blue and green are upstream box A and box B promoter elements, respectively, found in opposite orientation to the U2 snRNA and vtRNA transcribed sequences. Note that vtRNA genes also possess internal boxes A and B (Figs. 1 and 3). Nucleotides matching the consensus for boxes A and B are in bold.

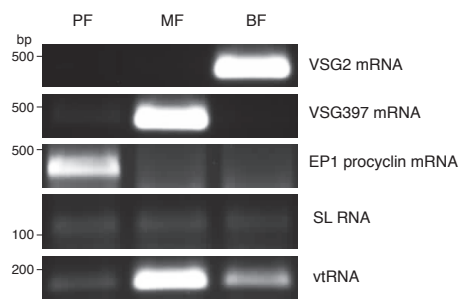

**Figure S6. vtRNA has increased abundance in quiescent metacyclic *T. brucei* cells.** Semi-quantitative RT-PCR reactions, using the same cell number equivalent of total RNA for procyclic, metacyclic and bloodstream-form trypanosomes. Ethidium bromide stained agarose gels are shown.

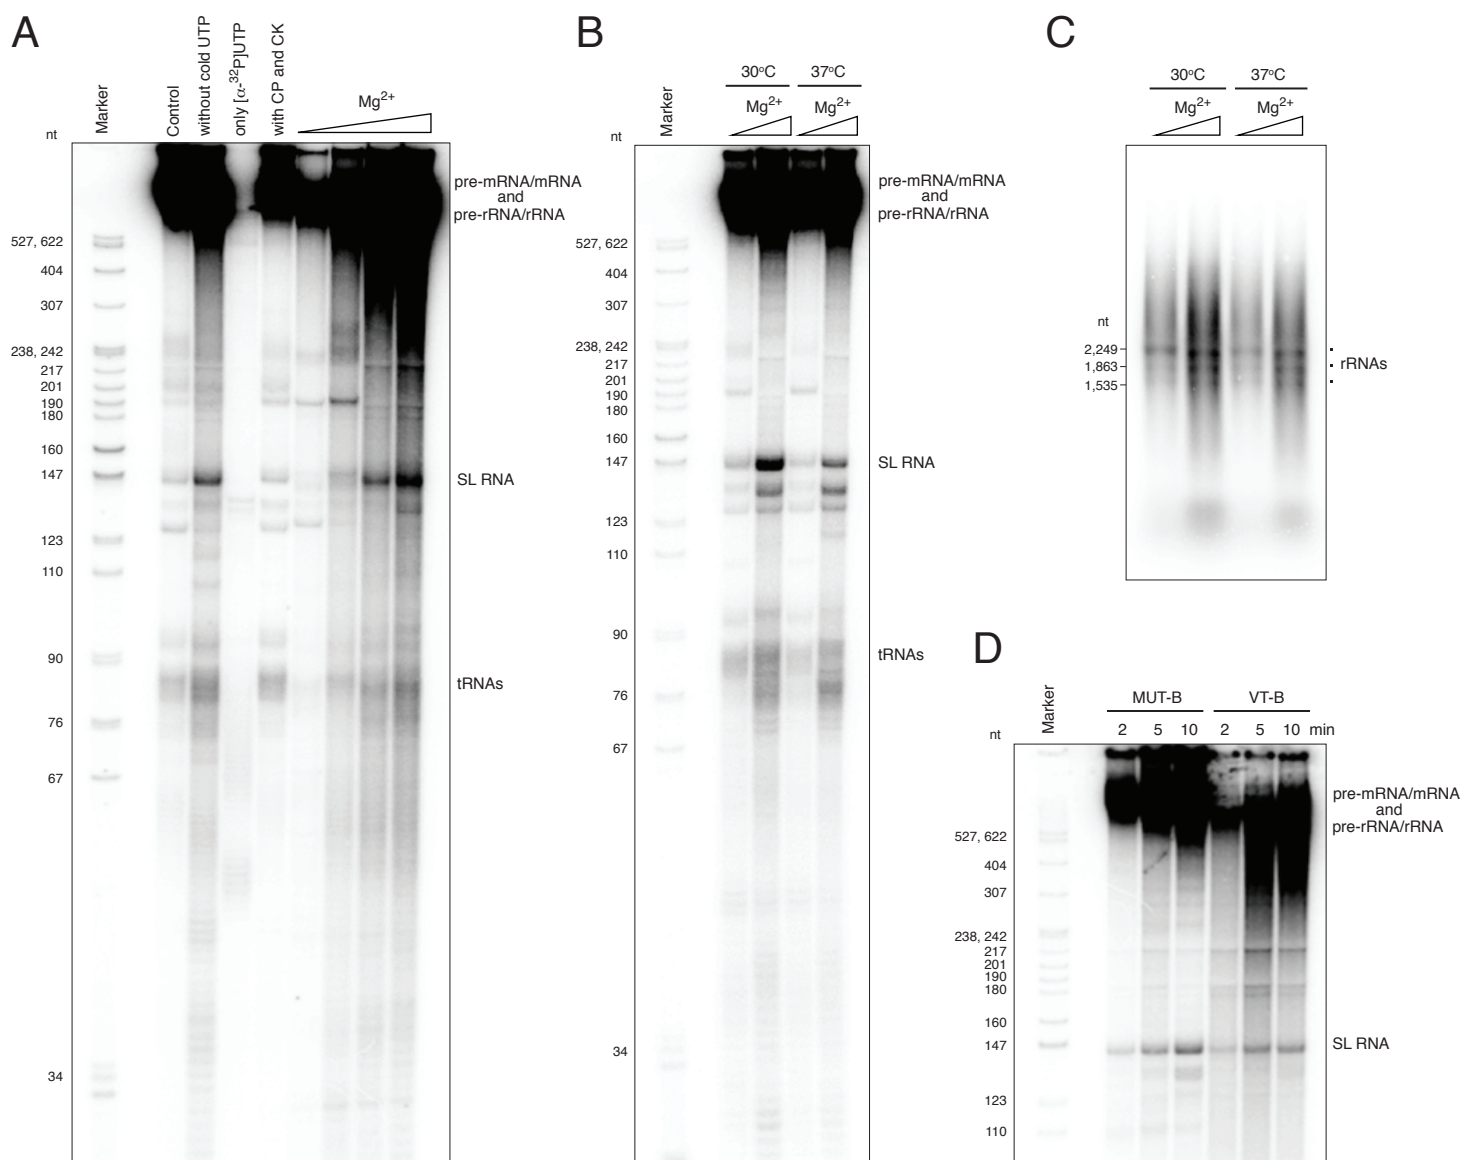

**Figure S7. Optimization of the bloodstream-form permeable cell system.** *A*, different reaction conditions for RNA synthesis after permeabilization. All reactions were incubated for 30 min at 30°C. Control – a reaction equivalent to the procyclic form permeabilized cell system, except sucrose in the buffer is substituted with glucose and ATP regeneration system is omitted; without cold UTP – a reaction containing ATP, GTP, CTP and  $[\alpha\text{-}^{32}\text{P}]\text{UTP}$ , but no nonradioactive UTP; only  $[\alpha\text{-}^{32}\text{P}]\text{UTP}$  – a reaction containing only  $[\alpha\text{-}^{32}\text{P}]\text{UTP}$ , and no ATP, GTP, CTP or nonradioactive UTP; with CP and CK – a reaction with added creatine phosphate and creatine kinase; last 4 reactions – increasing concentration of  $\text{Mg}^{2+}$ , 1, 3, 6 and 10 mM. Marker is a  $^{32}\text{P}$ -labeled pBR322 DNA MspI digest; *B*, reactions testing the combined effect on RNA synthesis of 3 or 10 mM  $\text{Mg}^{2+}$  and 30°C or 37°C. RNA is separated on denaturing 10% polyacrylamide gel. Marker is a  $^{32}\text{P}$ -labeled pBR322 DNA MspI digest; *C*, reactions testing the combined effect on RNA synthesis of 3 or 10 mM  $\text{Mg}^{2+}$  and 30°C or 37°C. RNA was separated on denaturing 1.2% agarose gel; *D*, testing the effect of incubation time after permeabilization in the presence of anti-vtRNA oligo (VT-B) or a mutant oligo control (MUT-B) on SL RNA levels. Marker is a  $^{32}\text{P}$ -labeled pBR322 DNA MspI digest.



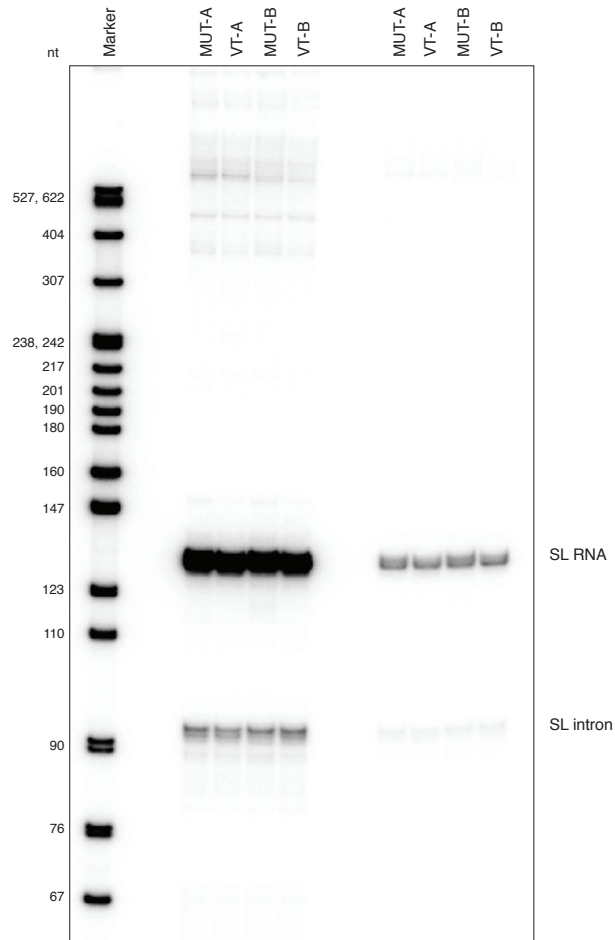

**Figure S8. Lack of major defects in SL RNA capping and branched SL-intron formation in cells with reduced vtRNA levels.** Cells were permeabilized in the presence of the indicated oligonucleotides and then incubated at 30°C for 5 min with nonradioactive ribonucleoside triphosphates. Total RNA was prepared with Trizol reagent and used for primer extension reactions with <sup>32</sup>P-labeled primer annealing to positions 118 to 130 in the SL RNA. Since the *T. brucei* SL RNA cap is highly modified, primer extension gives distinct patterns of products for fully modified, partially modified and unmodified caps. Products were separated on denaturing 8% polyacrylamide gel. The two sets of lanes represent two different amounts of loaded samples.
